# Supplementary material for: A pan-cancer somatic mutation embedding using autoencoders
Source: Springer Nature journal article supplement (doi:10.1186/s12859-019-3298-z), 2019-12-01
Supplement: 12859_2019_3298_MOESM1_ESM.pdf [file 12859_2019_3298_MOESM1_ESM.pdf]

**Supplementary material:**

**A Pan-cancer Somatic Mutation Embedding using Autoencoders**

Martin Palazzo<sup>1,2,3</sup>, Pierre Beuseroy<sup>2</sup> and Patricio Yankilevich<sup>1\*</sup>

Author affiliation:

<sup>1</sup> Instituto de Investigación en Biomedicina de Buenos Aires (IBioBA) - CONICET -

Partner Institute of the Max Planck Society, Buenos Aires, Argentina

<sup>2</sup> Institut Charles Delaunay, Université de Technologie de Troyes, Troyes, France

<sup>3</sup> Universidad Tecnológica Nacional, Facultad Regional Buenos Aires, Argentina

\* Corresponding author

Correspondence:

Patricio Yankilevich Email: [pyankilevich@ibioba-mpsp-conicet.gov.ar](mailto:pyankilevich@ibioba-mpsp-conicet.gov.ar)

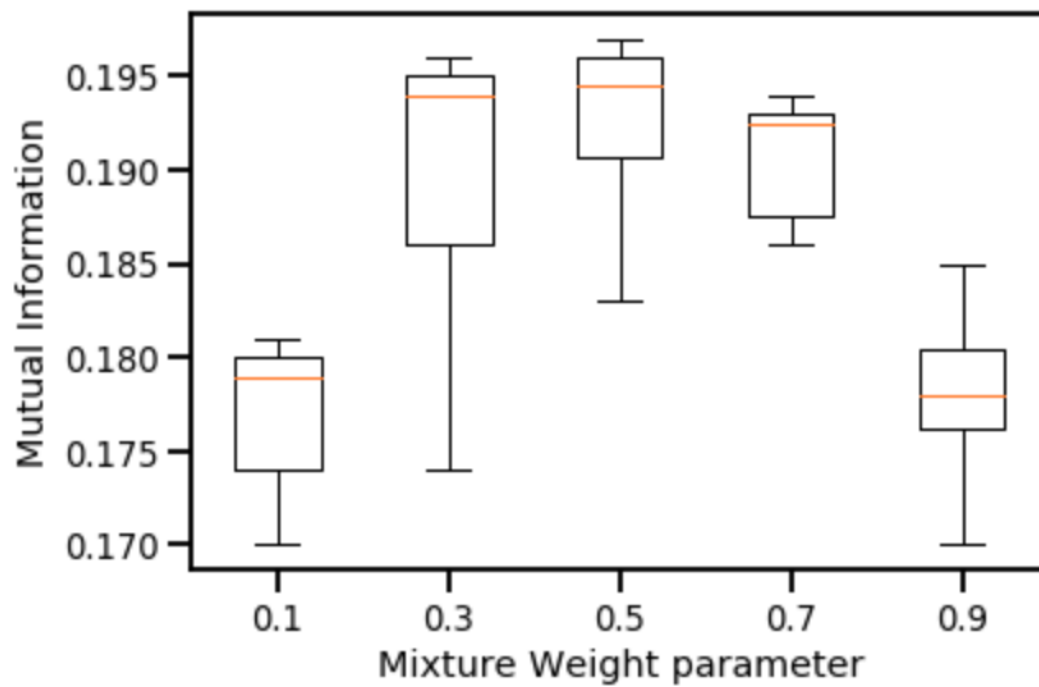

**Figure S1. Mixture weight parameter.** Mutual information values after cross validation for different values of  $\alpha$  parameter. The final value of the mixture weight parameter is  $\alpha = 0.5$  since it maximizes the mutual information score.
